# Supplementary material
Source: PubMed Central journal article supplement (PMC3675931)
Supplement: AEM.03990-12_zam999104449so1.pdf [file AEM.03990-12_zam999104449so1.pdf]

**TABLE S1** PCR oligonucleotide primer list used in this study

| Species                             | Genes                       | Sequences (5'-3')                                                                            | Reference                  |
|-------------------------------------|-----------------------------|----------------------------------------------------------------------------------------------|----------------------------|
| Campy-genus specific                | 16S rRNA                    | GGA TGA CAC TTT TCG GAG C<br>CAT TGT AGC ACG TGT GTC                                         | Linton et al. (1996)       |
| <i>C. jejuni</i>                    | <i>mapA</i>                 | GGA CGG TAA CTA GTT TAG TAT T<br>CTA TTT TAT TTT TGA GTG CTT GTG                             | Stucki et al. (1995)       |
| <i>C. coli</i>                      | <i>ceuE</i>                 | AAT TGA AAA TTG CTC CAA CTA TG<br>TGA TTT TAT TAT TTG TAG CAG CG                             | Gonzalez et al. (1997)     |
| <i>C. lari</i>                      | 16S–23 S rRNA<br>ITS region | CTT ACT TTA GGT TTT AAG ACC<br>CAA TAA AAC CTT ACT ATC TC                                    | Khan and Edge (2007)       |
| <i>Campylobacter</i> spp.           | 16S rRNA                    | CACGTGCTACAATGGCATAT<br>GGCTTCATGCTCTCGAGTT<br>FAM-CAGAGAACAATCCGAACTGGGACA-TAMRA            | Lund et al. (2004)         |
| <i>Catelicoccus</i> -like organisms | 16S rRNA                    | GGTGCTTGCACCGACYTAAG<br>CTCTCACACGTGTCTTCTTC                                                 | Ryu, et al. (2012)         |
| <i>Enterococcus</i> spp.            | 23S rRNA                    | AGAAATTCCAAACGAACTTG<br>CAGTGCTCTACCTCCATCATT<br>FAM-TGGTTCTCTCCGAAATA<br>GCTTTAGGGCTA-TAMRA | Haugland et al. (2005)     |
| <i>Escherichia coli</i>             | 23S rRNA                    | CATAAGCGTCGCTGCCG<br>AAAGAAAGCGTAATAGCTCACTGGTC<br>FAM-TACATCTTCCGCGCAGGCCGACT-TAMRA         | Ludwig and Scheifer (2000) |
| <i>Bacteroidetes</i> spp.           | 16S rRNA (HF183-708R)       | ATCATGAGTTCACATGTCCCG<br>TCAAATGATACATAGTGCGATAC                                             | Bernhard and Field (2000)  |
| <i>Bacteroidetes</i> spp.           | 16S rRNA (CF12-8-708R)      | CAATCGGAGTTCTTCGTG<br>TCAAATGATACATAGTGCGATAC                                                | Bernhard and Field (2000)  |
| <i>Bacteroidetes</i> spp.           | 16S rRNA                    | AACGCTAGCTACAGGCTTAACA<br>ACGCTACTTGGCTGGTTCA<br>FAM-CAATATTCCTCACTGCTGCCTCCCGTA-TAMRA       | Dick and Field. 2004       |

**TABLE S2** PCR results of *Campylobacter* spp. (Camp) and *C. jejuni* (*mapA*) in Sandhill crane excreta

| Date      | Site | Camp (Bolton broth) | <i>mapA</i> (Bolton broth) | Camp (direct DNA) | <i>mapA</i> (direct DNA) |
|-----------|------|---------------------|----------------------------|-------------------|--------------------------|
| 3/15/2010 | C1   | -                   | -                          | -                 | -                        |
| 3/15/2010 | C2   | -                   | -                          | -                 | -                        |
| 3/15/2010 | C3   | -                   | -                          | -                 | -                        |
| 3/15/2010 | C4   | -                   | -                          | +                 | +                        |
| 3/15/2010 | C5   | -                   | -                          | +                 | +                        |
| 3/15/2010 | C6   | -                   | -                          | -                 | -                        |
| 3/25/2010 | C7   |                     |                            | -                 | -                        |
| 3/25/2010 | C8   |                     |                            | -                 | -                        |
| 3/25/2010 | C9   |                     |                            | -                 | -                        |
| 3/25/2010 | C10  |                     |                            | -                 | -                        |
| 3/25/2010 | C11  |                     |                            | +                 | +                        |
| 3/25/2010 | C12  |                     |                            | -                 | -                        |
| 3/25/2010 | C13  |                     |                            | -                 | -                        |
| 3/25/2010 | C14  |                     |                            | -                 | -                        |
| 3/25/2010 | C15  |                     |                            | -                 | -                        |
| 3/25/2010 | C16  |                     |                            | -                 | -                        |
| 3/25/2010 | C17  |                     |                            | -                 | -                        |
| 3/25/2010 | C18  |                     |                            | -                 | -                        |
| 3/25/2010 | C19  |                     |                            | -                 | -                        |
| 3/25/2010 | C20  |                     |                            | +                 | -                        |
| 3/25/2010 | C21  |                     |                            | -                 | -                        |
| 3/25/2010 | C22  |                     |                            | -                 | -                        |
| 3/18/2010 | C146 | +                   | +                          | +                 | +                        |
| 3/18/2010 | C147 | +                   | +                          | +                 | +                        |
| 3/18/2010 | C148 | -                   | -                          | -                 | -                        |
| 3/18/2010 | C149 | -                   | -                          | -                 | -                        |
| 3/18/2010 | C150 | +                   | +                          | +                 | +                        |

**TABLE S2** Continue:

| Date                | Site | Camp (Bolton broth) | <i>mapA</i> (Bolton broth) | Camp <i>mapA</i> (filtered) | <i>mapA</i> (filtered) |
|---------------------|------|---------------------|----------------------------|-----------------------------|------------------------|
| 3/18/2010           | C151 | -                   | -                          | +                           | -                      |
| 3/18/2010           | C152 | -                   | -                          | +                           | -                      |
| 3/18/2010           | C153 | -                   | -                          | +                           | +                      |
| 3/18/2010           | C154 | -                   | -                          | +                           | +                      |
| 3/18/2010           | C155 | -                   | -                          | +                           | +                      |
| 3/18/2010           | C156 | -                   | -                          | -                           | -                      |
| 3/18/2010           | C157 | -                   | -                          | +                           | +                      |
| 3/18/2010           | C158 | -                   | -                          | +                           | -                      |
| 3/18/2010           | C159 | -                   | -                          | -                           | -                      |
| 3/18/2010           | C160 | -                   | -                          | -                           | -                      |
| 3/18/2010           | C164 | +                   | +                          | -                           | -                      |
| 4/5/2010            | C426 | -                   | -                          | +                           | +                      |
| 4/5/2010            | C427 | -                   | -                          | +                           | +                      |
| 4/5/2010            | C428 | +                   | -                          | +                           | -                      |
| 4/5/2010            | C429 | -                   | -                          | -                           | -                      |
| 4/5/2010            | C430 | -                   | -                          | -                           | -                      |
| 4/5/2010            | C431 | +                   | +                          | +                           | +                      |
| 4/5/2010            | C432 | -                   | -                          | -                           | -                      |
| 4/5/2010            | C433 | -                   | -                          | -                           | -                      |
| 4/5/2010            | C434 | -                   | -                          | -                           | -                      |
| 4/5/2010            | C435 | +                   | -                          | +                           | -                      |
| 4/5/2010            | C436 | +                   | -                          | +                           | -                      |
| 4/5/2010            | C437 | -                   | -                          | +                           | +                      |
| 4/5/2010            | C438 | +                   | -                          | +                           | -                      |
| 4/5/2010            | C439 | -                   | +                          | -                           | -                      |
| 4/5/2010            | C440 | +                   | +                          | +                           | +                      |
| 4/5/2010            | C441 | +                   | +                          | +                           | +                      |
| 4/5/2010            | C442 | +                   | +                          | +                           | -                      |
| 4/5/2010            | C443 | +                   | +                          | +                           | -                      |
| 4/5/2010            | C444 | -                   | -                          | -                           | -                      |
| 4/5/2010            | C445 | -                   | -                          | +                           | +                      |
| 4/5/2010            | C446 | +                   | +                          | +                           | +                      |
| 4/5/2010            | C447 | +                   | +                          | +                           | -                      |
| 4/5/2010            | C448 | -                   | +                          | -                           | -                      |
| 4/5/2010            | C449 | -                   | -                          | +                           | -                      |
| 4/5/2010            | C450 | -                   | -                          | +                           | +                      |
| 4/5/2010            | C451 | -                   | -                          | -                           | -                      |
|                     |      |                     |                            | 31(48.4                     |                        |
| <b>Total Counts</b> |      |                     |                            | <b>%)</b>                   | <b>19(29.7%)</b>       |

**TABLE S3** PCR results of *Campylobacter* spp. (Camp) and *C. jejuni* (*mapA*) in snow goose feces

| Date                | Site | Camp (Bolton broth) | <i>mapA</i> (Bolton broth) | Camp (direct DNA) | <i>mapA</i> (direct DNA) |
|---------------------|------|---------------------|----------------------------|-------------------|--------------------------|
| 3/15/2010           | G20  | -                   | -                          | -                 | -                        |
| 3/15/2010           | G21  | +                   | -                          | +                 | +                        |
| 3/15/2010           | G22  | +                   | -                          | +                 | -                        |
| 3/15/2010           | G23  | -                   | -                          | -                 | -                        |
| 3/15/2010           | G24  | -                   | -                          | -                 | -                        |
| 3/15/2010           | G25  | -                   | -                          | -                 | -                        |
| 3/15/2010           | G26  | -                   | -                          | -                 | -                        |
| 3/15/2010           | G27  | -                   | -                          | -                 | -                        |
| 3/15/2010           | G28  | -                   | -                          | -                 | -                        |
| 3/15/2010           | G29  | -                   | -                          | -                 | -                        |
| 3/15/2010           | G30  | -                   | -                          | -                 | -                        |
| 3/15/2010           | G31  | -                   | -                          | -                 | -                        |
| 3/15/2010           | G32  | -                   | -                          | -                 | -                        |
| 3/15/2010           | G33  | -                   | -                          | -                 | -                        |
| 3/15/2010           | G34  | -                   | -                          | -                 | -                        |
| 3/15/2010           | G35  | -                   | -                          | -                 | -                        |
| 3/15/2010           | G36  | -                   | -                          | -                 | -                        |
| 3/15/2010           | G37  | -                   | -                          | -                 | -                        |
| 3/15/2010           | G38  | -                   | -                          | -                 | -                        |
| 3/15/2010           | G39  | -                   | -                          | -                 | -                        |
| 3/15/2010           | G40  | -                   | -                          | -                 | -                        |
| 3/15/2010           | G41  | -                   | -                          | -                 | -                        |
| <b>Total Counts</b> |      |                     |                            | <b>2 (9.1%)</b>   | <b>1(4.5%)</b>           |

**TABLE S4** PCR results of *Campylobacter* spp. (Camp), *C. jejuni* (*mapA*), human (HF183) and cattle (CF128) in water samples

| Date      | Site         | Camp<br>(Bolton<br>broth) | <i>mapA</i><br>(Bolton<br>broth) | Camp<br>(direct<br>DNA) | <i>mapA</i><br>(direct<br>DNA) | CF128 | HF183 |
|-----------|--------------|---------------------------|----------------------------------|-------------------------|--------------------------------|-------|-------|
| 1/18/2010 | Overton      | -                         | -                                | -                       | -                              | ++    | ++    |
| 1/18/2010 | Denman       | -                         | -                                | -                       | -                              | +     | ++    |
| 1/18/2010 | Grand island | -                         | -                                | -                       | -                              | -     | -     |
| 2/1/2010  | Overton      | -                         | -                                | -                       | -                              | -     | -     |
| 2/1/2010  | Denman       | -                         | -                                | -                       | -                              | -     | -     |
| 2/1/2010  | Grand island | -                         | -                                | -                       | -                              | -     | -     |
| 2/15/2010 | Overton      | -                         | -                                | -                       | -                              | ++    | -     |
| 2/15/2010 | Denman       | -                         | -                                | -                       | -                              | ++    | +     |
| 2/15/2010 | Grand island | -                         | -                                | -                       | -                              | -     | -     |
| 3/1/2010  | Overton      | -                         | -                                | -                       | -                              | -     | -     |
| 3/1/2010  | Denman       | -                         | -                                | -                       | -                              | -     | -     |
| 3/1/2010  | Grand island | -                         | -                                | -                       | -                              | -     | -     |
| 3/8/2010  | Overton      | -                         | -                                | -                       | -                              | -     | -     |
| 3/8/2010  | Denman       | -                         | -                                | -                       | -                              | -     | -     |
| 3/8/2010  | Grand island | -                         | -                                | -                       | -                              | -     | +     |
| 3/15/2010 | Overton      | -                         | -                                | -                       | -                              | -     | -     |
| 3/15/2010 | Denman       | -                         | -                                | -                       | -                              | -     | -     |
| 3/15/2010 | Grand island | -                         | -                                | -                       | -                              | -     | -     |
| 3/18/2010 | Overton      | +                         | +                                | +                       | +                              | -     | -     |
| 3/18/2010 | Denman       | +                         | +                                | +                       | +                              | -     | ++    |
| 3/18/2010 | Grand island | +                         | +                                | +                       | +                              | -     | -     |
| 3/22/2010 | Overton      | -                         | -                                | +                       | +                              | +     | ++    |
| 3/22/2010 | Denman       | -                         | -                                | +                       | +                              | -     | -     |
| 3/22/2010 | Grand island | -                         | -                                | +                       | -                              | +     | ++    |
| 3/24/2010 | Overton      | -                         | -                                | +                       | -                              | +     | -     |
| 3/24/2010 | Denman       | -                         | -                                | -                       | -                              | +     | -     |
| 3/24/2010 | Grand island | -                         | -                                | -                       | -                              | -     | -     |
| 3/29/2010 | Overton      | -                         | -                                | -                       | -                              | -     | -     |
| 3/29/2010 | Denman       | -                         | -                                | +                       | -                              | -     | -     |
| 3/29/2010 | Grand island | -                         | -                                | +                       | -                              | -     | -     |
| 4/5/2010  | Overton      | -                         | -                                | +                       | -                              | ++    | ++    |
| 4/5/2010  | Denman       | -                         | -                                | +                       | +                              | +     | ++    |
| 4/5/2010  | Grand island | -                         | -                                | -                       | -                              | -     | -     |

**TABLE S4** Continue:

| Date                | Site         | Camp<br>(Bolton<br>broth) | <i>mapA</i><br>(Bolton<br>broth) | Camp<br>(direct<br>DNA) | <i>mapA</i><br>(direct<br>DNA) | CF128 | HF183 |
|---------------------|--------------|---------------------------|----------------------------------|-------------------------|--------------------------------|-------|-------|
|                     |              |                           |                                  |                         |                                |       |       |
| 4/13/2010           | Denman       | -                         | -                                | -                       | -                              | -     | -     |
| 4/13/2010           | Grand island | -                         | -                                | -                       | -                              | -     | -     |
| 4/21/2010           | Overton      | -                         | -                                | -                       | -                              | -     | -     |
| 4/21/2010           | Denman       | -                         | -                                | -                       | -                              | -     | -     |
| 4/21/2010           | Grand island | -                         | -                                | -                       | -                              | -     | -     |
| 4/26/2010           | Overton      | -                         | -                                | -                       | -                              | +     | +     |
| 4/26/2010           | Denman       | -                         | -                                | -                       | -                              | +     | ++    |
| 4/26/2010           | Grand island | -                         | -                                | -                       | -                              | -     | -     |
| 5/24/2010           | Overton      | -                         | -                                | -                       | -                              | -     | -     |
| 5/24/2010           | Denman       | -                         | -                                | -                       | -                              | -     | -     |
| 5/24/2010           | Grand island | -                         | -                                | -                       | -                              | -     | -     |
| <b>Total Counts</b> |              | <b>3</b>                  | <b>3</b>                         | <b>11</b>               | <b>6</b>                       |       |       |
| Before              |              | 0                         | 0                                | 0                       | 0                              | 44.44 | 33.33 |
| During              |              |                           | 12.5                             | 12.5                    | 45.83                          | 25    | 25.00 |
| After               |              | 0                         | 0                                | 0                       | 0                              | 33.33 | 33.33 |
| Overall (%)         |              |                           |                                  | 24.44                   | 13.33                          | 26.67 | 26.67 |

**TABLE S5** PCR results of *Campylobacter* spp. (Camp) and *C. jejuni* (*mapA*) in sediment samples

| Date            | Site      | Camp (Bolton broth) | <i>mapA</i> (Bolton broth) | Camp (direct DNA) | <i>mapA</i> (direct DNA) |
|-----------------|-----------|---------------------|----------------------------|-------------------|--------------------------|
| 3/8/2010        | Sediment  | -                   | -                          | -                 | -                        |
| 3/15/2010       | Sediment  | -                   | -                          | -                 | -                        |
| 3/18/2010       | Sediment  | +                   | +                          | +                 | +                        |
| 3/22/2010       | Sediment  | -                   | -                          | -                 | -                        |
| 3/24/2010       | Sediment  | -                   | -                          | -                 | -                        |
| 3/29/2010       | Sediment1 | -                   | -                          | -                 | -                        |
| 4/5/2010        | Sediment  | -                   | -                          | -                 | -                        |
| 4/13/2010       | Sediment1 | -                   | -                          | -                 | -                        |
| 4/21/2010       | Sediment1 | -                   | -                          | -                 | -                        |
| 4/26/2010       | Sediment1 | -                   | -                          | -                 | -                        |
| 5/24/2010       | Sediment1 | -                   | -                          | -                 | -                        |
| Total<br>Counts |           |                     |                            | 1<br>(11.1%)      | 1 (11.1%)                |

**TABLE S6** qPCR standard curve parameters and detection limits for *Campylobacter jejuni* LMG 8842 in different matrices

|                                                               | Molecular<br>scale<br>water | Sample<br>water <sup>a</sup> | Crane<br>excreta <sup>a</sup> | Sediment        |
|---------------------------------------------------------------|-----------------------------|------------------------------|-------------------------------|-----------------|
| Linear equation <sup>a</sup>                                  | -3.588x + 40.53             | -3.373x + 38.21              | -3.464x + 43.36               | -3.554x + 41.82 |
| Correlation R <sup>2</sup>                                    | 0.979                       | 0.964                        | 0.964                         | 0.983           |
| qPCR<br>Efficiency <sup>b</sup>                               | 90%                         | 98%                          | 94%                           | 91%             |
| Detection limit<br>(cell<br>equivalence<br>mL <sup>-1</sup> ) | 100                         | 100                          | 100                           | 100             |

<sup>a</sup>Sample water and crane excreta were tested negative for *Campylobacter jejuni*. <sup>b</sup>Standard curve with 3 replicates  
(<sup>a</sup>Efficiency was  $100 \times (10^{(-1/\text{slope})} - 1)$ )



**TABLE S7** qPCR standard curve parameters and detection limits by spiking bacterial surrogates into filtered Platte River water for different assays

| Surrogates                                           | <i>Bacteriodes</i>                 |                                         |                                   |                                       |
|------------------------------------------------------|------------------------------------|-----------------------------------------|-----------------------------------|---------------------------------------|
|                                                      | <i>Escherichia coli</i> K12 MG1655 | <i>Enterococcus faecalis</i> ATCC 29212 | <i>thetaitaomicron</i> ATCC 29741 | <i>Catelllicoccus</i> -like organisms |
| Linear equation <sup>a</sup>                         | -2.956x + 35.16                    | -3.578x + 42.41                         | -3.212x + 44.53                   | -3.580x + 39.50                       |
| Correlation R <sup>2</sup>                           | 0.996                              | 0.995                                   | 0.942                             | 0.990                                 |
| qPCR Efficiency <sup>b</sup>                         | 118%                               | 90%                                     | 105%                              | 90%                                   |
| Detection limit (cell equivalence mL <sup>-1</sup> ) | 100                                | 520                                     | 100                               | 0.1 <sup>b</sup>                      |

<sup>a</sup>standard curve with 3 replicates (<sup>a</sup>Efficiency was  $100 \times (10^{(-1/\text{slope})} - 1)$ ); <sup>b</sup>pg/reaction.

**TABLE S8** Mean quantity and fold changes of *Campylobacter* spp. and fecal indicators before-, during- and after Sandhill crane migration

| Migration period                  | <i>Campylobacter</i> spp. | <i>Bacteroidetes</i> spp. | <i>Enterococcus</i> spp. | <i>E. coli</i> |
|-----------------------------------|---------------------------|---------------------------|--------------------------|----------------|
| Jan-Feb15<br>(Before: CE/100 mL)  | 194                       | $1 \times 10^6$           | $5 \times 10^4$          | 86             |
| Mar1-Apr5<br>(During; CE/100 mL)  | 1100                      | $6 \times 10^5$           | $6 \times 10^5$          | 1580           |
| Apr13-May24<br>(After: CE/100 mL) | 0                         | $1 \times 10^5$           | $7 \times 10^3$          | 55             |
| Ratio<br>(During/Before)          | 6                         | 1                         | 11                       | 18             |
| During/After)                     | Not available             | 5                         | 90                       | 29             |

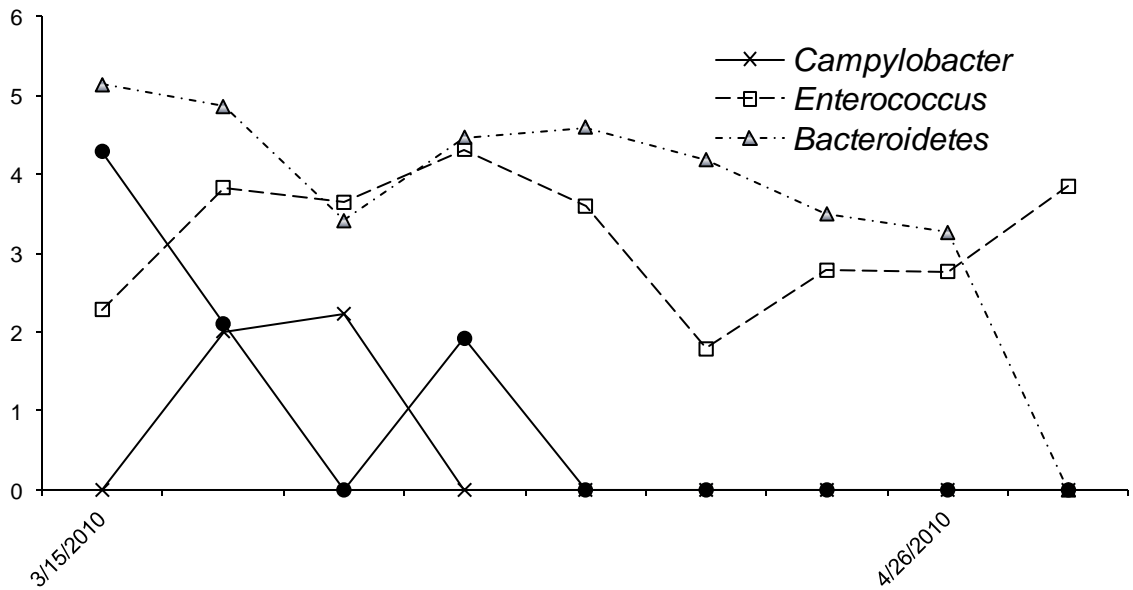

FIG S1 Variation in the relative abundance of *Campylobacter* spp., fecal indicator bacteria (*E. coli*, *Enterococcus* spp. and *Bacteroidetes* spp.) in Central Platte River sediment samples during - (Mar – Apr5) and after (Apr14 – May) Sandhill crane migration

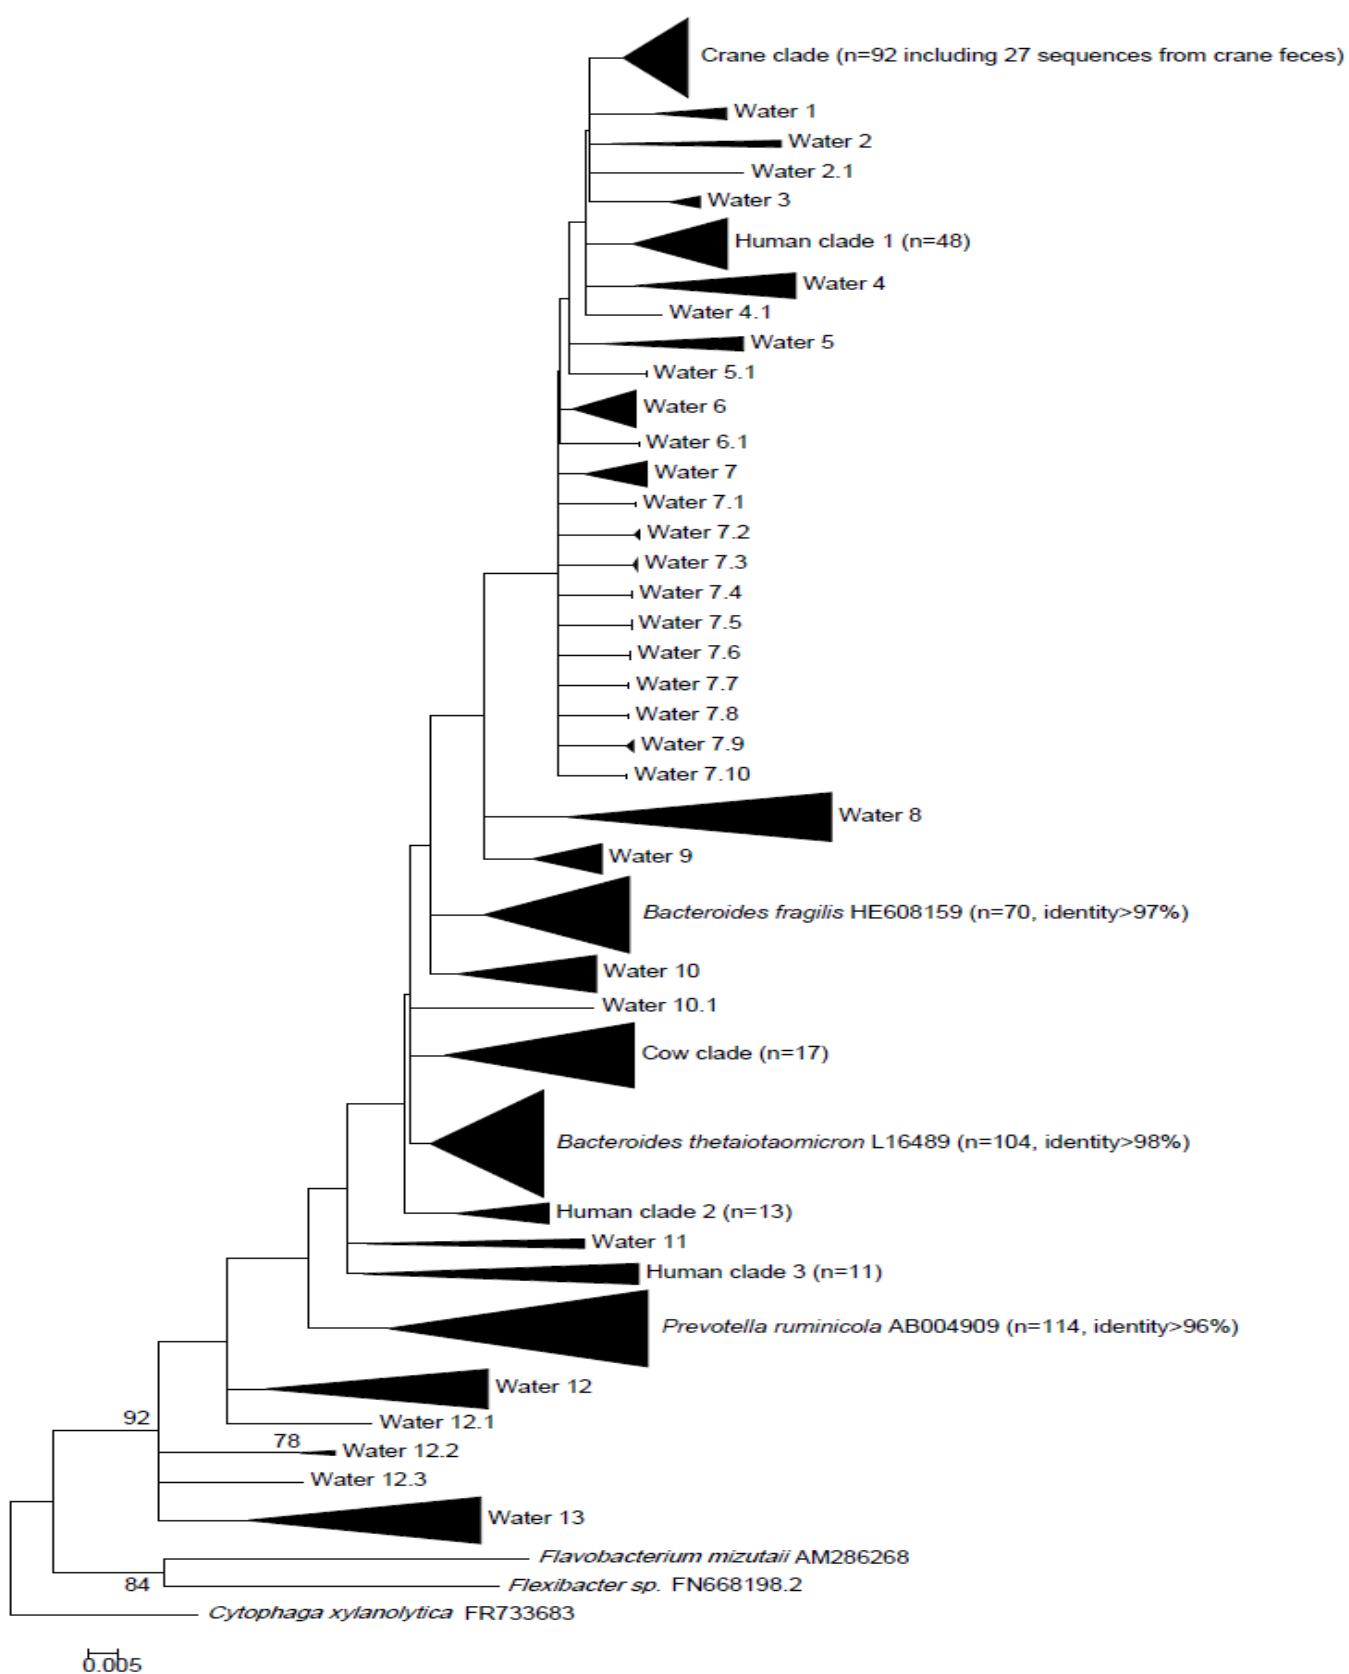

FIG S2 Unrooted neighbor-joining tree of 16S rRNA gene sequences (n=878) for *Bacteroidales* including samples of water (n=851) and Sandhill crane excreta (n=27), created with MEGA 4.1 (2 %<sub>0</sub> divergence)
